# Supplementary material for: An ensemble of 48 physically perturbed model estimates of the 1∕8° terrestrial water budget over the conterminous United States, 1980–2015
Source: Copernicus journal article supplement (doi:10.5194/essd-15-2755-2023), 2023-07-04
Supplement: Supplementary file 1 [file essd-15-2755-2023-supplement.pdf]

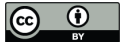

*Supplement of*

## **An ensemble of 48 physically perturbed model estimates of the 1/8° terrestrial water budget over the conterminous United States, 1980–2015**

**Hui Zheng et al.**

*Correspondence to:* Zong-Liang Yang ([liang@jsg.utexas.edu](mailto:liang@jsg.utexas.edu))

The copyright of individual parts of the supplement might differ from the article licence.

**Table S1.** The 25 AmeriFlux sites over CONUS used in this study, including site ID, site names, locations, landcover types recorded at the site, data start year, and data end year for the annual ET cycle and interannual ET anomaly.

| Site ID | Site Name                      | Longitude | Latitude | Data Start | Data End | Data DOI             | Data Citation          | Acknowledgment                                                                                                                        | Landcover Type    |
|---------|--------------------------------|-----------|----------|------------|----------|----------------------|------------------------|---------------------------------------------------------------------------------------------------------------------------------------|-------------------|
| US-Ho1  | Howland Forest (main tower)    | -68.74    | 45.20    | 1995       | 2020     | 10.17190/AMF/1246061 | (Hollinger, 2016)      | -                                                                                                                                     | Evergreen Forests |
| US-Me2  | Metolius mature ponderosa pine | -121.56   | 44.45    | 2002       | 2021     | 10.17190/AMF/1246076 | (Law, 2016)            | The MetoliusAmeriFlux research was supported by the Office of Science (BER), U.S. Department of Energy, Grant No. DE-FG02-06ER64318). |                   |
| US-NR1  | Niwot Ridge Forest (LTER NWT1) | -105.55   | 40.03    | 1998       | 2021     | 10.17190/AMF/1246088 | (Blanken et al., 2016) | Funding for the AmeriFlux core site US-NR1 data was provided by the U.S. Department of Energy's Office of Science.                    |                   |
| US-Wrc  | Wind River Crane Site          | -121.95   | 45.82    | 1998       | 2015     | 10.17190/AMF/1246114 | (Wharton, 2016)        | -                                                                                                                                     |                   |
| US-GLE  | GLEES                          | -106.24   | 41.37    | 1999       | 2020     | 10.17190/AMF/1246056 | (Massman, 2016)        | -                                                                                                                                     |                   |
| US-CMW  | Charleston Mesquite Woodland   | -110.18   | 31.67    | 2000       | 2019     | 10.17190/AMF/1660339 | (Scott, 2020)          | -                                                                                                                                     | Deciduous Forests |

|        |                                 |        |       |      |      |                      |                             |                                                                                                                                                                                                                                                                                                              |               |
|--------|---------------------------------|--------|-------|------|------|----------------------|-----------------------------|--------------------------------------------------------------------------------------------------------------------------------------------------------------------------------------------------------------------------------------------------------------------------------------------------------------|---------------|
| US-Ha1 | Harvard Forest EMS Tower (HFR1) | -72.17 | 42.54 | 1991 | 2020 | 10.17190/AMF/1246059 | (Munger, 2016)              | Operation of the US-Ha1 site is supported by the AmeriFlux Management Project with funding by the U.S. Department of Energy's Office of Science under Contract No. DE-AC02-05CH11231, and additionally is a part of the Harvard Forest LTER site supported by the National Science Foundation (DEB-1832210). |               |
| US-MMS | Morgan Monroe State Forest      | -86.41 | 39.32 | 1999 | 2021 | 10.17190/AMF/1246080 | (Novick and Phillips, 2016) | AmeriFlux Management Project                                                                                                                                                                                                                                                                                 |               |
| US-WCr | Willow Creek                    | -90.08 | 45.81 | 1998 | 2020 | 10.17190/AMF/1246111 | (Desai, 2016c)              | -                                                                                                                                                                                                                                                                                                            |               |
| US-PFa | Park Falls/WLEF                 | -90.27 | 45.95 | 1995 | 2020 | 10.17190/AMF/1246090 | (Desai, 2016a)              | -                                                                                                                                                                                                                                                                                                            | Mixed Forests |
| US-NC1 | NC_Clearcut                     | -76.71 | 35.81 | 2005 | 2012 | 10.17190/AMF/1246082 | (Noormets, 2016)            | -                                                                                                                                                                                                                                                                                                            | Shrublands    |
| US-Ced | Cedar Bridge                    | -74.38 | 39.84 | 2005 | 2014 | 10.17190/AMF/1246043 | (Clark, 2016)               | -                                                                                                                                                                                                                                                                                                            |               |
| US-FR3 | Freeman Ranch- Woodland         | -97.99 | 29.94 | 2004 | 2012 | 10.17190/AMF/1246055 | (Heilman, 2016)             | -                                                                                                                                                                                                                                                                                                            |               |

|            |                                                               |         |       |      |      |                      |                          |                                                                                                                                                                                                                                                                  |            |
|------------|---------------------------------------------------------------|---------|-------|------|------|----------------------|--------------------------|------------------------------------------------------------------------------------------------------------------------------------------------------------------------------------------------------------------------------------------------------------------|------------|
| US-<br>KS2 | Kennedy Space Center (scrub oak)                              | -80.67  | 28.61 | 1999 | 2006 | 10.17190/AMF/1246070 | (Drake and Hinkle, 2016) | -                                                                                                                                                                                                                                                                |            |
| US-<br>SO2 | Sky Oaks- Old Stand                                           | -116.62 | 33.37 | 1997 | 2006 | 10.17190/AMF/1246097 | (Oechel, 2016)           | -                                                                                                                                                                                                                                                                |            |
| US-<br>SRM | Santa Rita Mesquite                                           | -110.87 | 31.82 | 2003 | 2021 | 10.17190/AMF/1246104 | (Scott, 2016a)           | Funding for the AmeriFlux core site was provided by the U.S. Department of Energy's Office of Science and the USDA.                                                                                                                                              | Savannas   |
| US-<br>Ton | Tonzi Ranch                                                   | -120.97 | 38.43 | 2001 | 2020 | 10.17190/AMF/1245971 | (Ma et al., 2016a)       | This research was supported by the US Department of Energy Terrestrial Carbon Program, grant No. DE-FG03-00ER63013 and DE-SC0005130. This research was supported in part by the Office of Science (BER), U.S. Department of Energy, Grant No. DE-FG02-03ER63638. |            |
| US-<br>IB2 | Fermi National Accelerator Laboratory- Batavia (Prairie site) | -88.24  | 41.84 | 2004 | 2018 | 10.17190/AFM/1246066 | (Matamala, 2016)         | -                                                                                                                                                                                                                                                                | Grasslands |
| US-<br>Kon | Konza Prairie LTER (KNZ)                                      | -96.56  | 39.08 | 2004 | 2019 | 10.17190/AMF/1246068 | (Brunsell, 2016)         | -                                                                                                                                                                                                                                                                |            |
| US-<br>Var | Vaira Ranch- Ione                                             | -120.95 | 38.41 | 2000 | 2020 | 10.17190/AMF/1245984 | (Ma et al., 2016b)       | This research was supported in part by the Office of Science (BER), U.S. Department of                                                                                                                                                                           |            |

|            |                                              |         |       |      |      |                      |                       |                                                                                                                                                                                                                                                                                                                                                                                       |           |
|------------|----------------------------------------------|---------|-------|------|------|----------------------|-----------------------|---------------------------------------------------------------------------------------------------------------------------------------------------------------------------------------------------------------------------------------------------------------------------------------------------------------------------------------------------------------------------------------|-----------|
| US-<br>Wkg | Walnut Gulch Kendall Grasslands              | -109.94 | 31.74 | 2004 | 2021 | 10.17190/AMF/1246112 | (Scott, 2016b)        | Energy, Grant No. DE-FG02-03ER63638.<br>Funding for the AmeriFlux core site was provided by the U.S. Department of Energy's Office of Science and the USDA.<br>This research was supported by the Office of Biological and Environmental Research of the US Department of Energy under contract No. DE-AC02-05CH11231 as part of the Atmospheric Radiation Measurement Program (ARM). | Croplands |
| US-<br>ARM | ARM Southern Great Plains site-<br>Lamont    | -97.49  | 36.61 | 2003 | 2021 | 10.17190/AMF/1246027 | (Biraud et al., 2016) |                                                                                                                                                                                                                                                                                                                                                                                       |           |
| US-<br>Ne1 | Mead - irrigated continuous maize site       | -96.48  | 41.17 | 2001 | 2020 | 10.17190/AMF/1246084 | (Suyker, 2016a)       | -                                                                                                                                                                                                                                                                                                                                                                                     |           |
| US-<br>Ne2 | Mead - irrigated maize-soybean rotation site | -96.47  | 41.16 | 2001 | 2020 | 10.17190/AMF/1246085 | (Suyker, 2016b)       | -                                                                                                                                                                                                                                                                                                                                                                                     |           |
| US-<br>Ne3 | Mead - rainfed maize-soybean rotation site   | -96.44  | 41.18 | 2001 | 2020 | 10.17190/AMF/1246086 | (Suyker, 2016c)       | -                                                                                                                                                                                                                                                                                                                                                                                     |           |

**Table S2.** Correlation coefficient (R) between different ET products (FLUXCOM and GLEAM ET) and ET observations from 25 AmeriFlux sites and for annual ET cycle and interannual ET anomaly.

| Site ID                        | Annual ET Cycle |       | Interannual ET Anomaly |       |
|--------------------------------|-----------------|-------|------------------------|-------|
|                                | FLUXNET         | GLEAM | FLUXNET                | GLEAM |
| US-Ho1                         | 0.99            | 0.96  | 0.18                   | 0.00  |
| US-Me2                         | 0.90            | 0.91  | 0.17                   | 0.67  |
| US-NR1                         | 0.96            | 0.94  | 0.11                   | 0.32  |
| US-Wrc                         | 0.98            | 0.67  | 0.05                   | -0.02 |
| US-GLE                         | 0.77            | 0.67  | 0.20                   | -0.09 |
| US-CMW                         | 0.85            | 0.75  | 0.32                   | 0.47  |
| US-Ha1                         | 1.00            | 0.96  | 0.34                   | 0.15  |
| US-MMS                         | 0.99            | 0.97  | 0.34                   | 0.36  |
| US-WCr                         | 0.99            | 0.93  | 0.38                   | 0.24  |
| US-PFa                         | 0.99            | 0.97  | 0.30                   | 0.27  |
| US-NC1                         | 0.99            | 0.98  | 0.43                   | 0.37  |
| US-Ced                         | 0.99            | 0.95  | 0.11                   | 0.39  |
| US-FR3                         | 0.97            | 0.95  | 0.86                   | 0.87  |
| US-KS2                         | 0.96            | 0.92  | 0.06                   | 0.25  |
| US-SO2                         | 0.94            | 0.61  | 0.68                   | 0.48  |
| US-SRM                         | 0.97            | 0.96  | 0.65                   | 0.78  |
| US-Ton                         | 0.91            | 0.99  | 0.71                   | 0.82  |
| US-IB2                         | 0.99            | 0.98  | 0.36                   | 0.46  |
| US-Kon                         | 0.99            | 0.97  | 0.36                   | 0.53  |
| US-Var                         | 0.55            | 0.81  | 0.67                   | 0.65  |
| US-Wkg                         | 0.98            | 0.98  | 0.41                   | 0.70  |
| US-ARM                         | 0.87            | 0.88  | 0.33                   | 0.29  |
| US-Ne1                         | 1.00            | 0.95  | 0.05                   | 0.25  |
| US-Ne2                         | 1.00            | 0.94  | -0.03                  | 0.13  |
| US-Ne3                         | 1.00            | 0.94  | 0.31                   | 0.29  |
| Median                         | 0.98            | 0.95  | 0.33                   | 0.36  |
| Average                        | 0.94            | 0.90  | 0.33                   | 0.39  |
| Frequency of being<br>the best | 21/25           | 5/25  | 11/25                  | 16/25 |

**Table S3.** As in Figure S2, but for Taylor skill score (TSS).

| Site ID                        | Annual ET Cycle |       | Interannual ET Anomaly |       |
|--------------------------------|-----------------|-------|------------------------|-------|
|                                | FLUXNET         | GLEAM | FLUXNET                | GLEAM |
| US-Ho1                         | 0.99            | 0.94  | 0.15                   | 0.50  |
| US-Me2                         | 0.93            | 0.93  | 0.04                   | 0.58  |
| US-NR1                         | 0.98            | 0.64  | 0.16                   | 0.66  |
| US-Wrc                         | 0.83            | 0.82  | 0.04                   | 0.47  |
| US-GLE                         | 0.74            | 0.44  | 0.10                   | 0.25  |
| US-CMW                         | 0.15            | 0.40  | 0.47                   | 0.70  |
| US-Ha1                         | 0.95            | 0.94  | 0.15                   | 0.41  |
| US-MMS                         | 0.98            | 0.97  | 0.34                   | 0.65  |
| US-WCr                         | 0.99            | 0.95  | 0.19                   | 0.35  |
| US-PFa                         | 0.92            | 0.86  | 0.50                   | 0.63  |
| US-NC1                         | 0.57            | 0.68  | 0.01                   | 0.05  |
| US-Ced                         | 0.93            | 0.98  | 0.03                   | 0.28  |
| US-FR3                         | 0.72            | 0.95  | 0.64                   | 0.92  |
| US-KS2                         | 0.97            | 0.64  | 0.06                   | 0.46  |
| US-SO2                         | 0.89            | 0.65  | 0.30                   | 0.63  |
| US-SRM                         | 0.76            | 0.98  | 0.70                   | 0.87  |
| US-Ton                         | 0.95            | 0.95  | 0.68                   | 0.91  |
| US-IB2                         | 0.91            | 0.93  | 0.14                   | 0.45  |
| US-Kon                         | 1.00            | 0.96  | 0.35                   | 0.35  |
| US-Var                         | 0.77            | 0.86  | 0.69                   | 0.82  |
| US-Wkg                         | 0.85            | 0.98  | 0.59                   | 0.80  |
| US-ARM                         | 0.86            | 0.76  | 0.58                   | 0.55  |
| US-Ne1                         | 1.00            | 0.91  | 0.35                   | 0.37  |
| US-Ne2                         | 1.00            | 0.94  | 0.31                   | 0.32  |
| US-Ne3                         | 0.99            | 0.96  | 0.52                   | 0.47  |
| Median                         | 0.93            | 0.93  | 0.31                   | 0.50  |
| Average                        | 0.86            | 0.84  | 0.32                   | 0.54  |
| Frequency of being<br>the best | 17/25           | 11/25 | 3/25                   | 23/25 |

**Table S4.** As in Figure S2, but for RMSE (mm month<sup>-1</sup>).

| Site ID                        | Annual ET Cycle |       | Interannual ET Anomaly |       |
|--------------------------------|-----------------|-------|------------------------|-------|
|                                | FLUXNET         | GLEAM | FLUXNET                | GLEAM |
| US-Ho1                         | 0.24            | 0.92  | 0.28                   | 0.40  |
| US-Me2                         | 0.43            | 0.39  | 0.37                   | 0.28  |
| US-NR1                         | 0.61            | 0.67  | 0.24                   | 0.27  |
| US-Wrc                         | 0.51            | 1.78  | 0.42                   | 0.66  |
| US-GLE                         | 0.78            | 0.94  | 0.39                   | 0.45  |
| US-CMW                         | 1.74            | 1.58  | 0.36                   | 0.35  |
| US-Ha1                         | 0.35            | 0.89  | 0.40                   | 0.45  |
| US-MMS                         | 0.50            | 0.71  | 0.22                   | 0.24  |
| US-WCr                         | 0.32            | 0.76  | 0.33                   | 0.35  |
| US-PFa                         | 0.56            | 0.92  | 0.22                   | 0.25  |
| US-NC1                         | 2.52            | 2.21  | 1.21                   | 1.20  |
| US-Ced                         | 0.42            | 0.52  | 0.55                   | 0.51  |
| US-FR3                         | 0.57            | 0.28  | 0.46                   | 0.38  |
| US-KS2                         | 0.27            | 1.22  | 0.46                   | 0.46  |
| US-SO2                         | 0.22            | 0.52  | 0.48                   | 0.53  |
| US-SRM                         | 0.34            | 0.22  | 0.26                   | 0.21  |
| US-Ton                         | 0.40            | 0.24  | 0.25                   | 0.22  |
| US-IB2                         | 0.52            | 0.53  | 0.31                   | 0.29  |
| US-Kon                         | 0.19            | 0.42  | 0.37                   | 0.34  |
| US-Var                         | 0.89            | 0.64  | 0.24                   | 0.29  |
| US-Wkg                         | 0.21            | 0.15  | 0.30                   | 0.23  |
| US-ARM                         | 0.54            | 0.70  | 0.53                   | 0.54  |
| US-Ne1                         | 0.20            | 0.69  | 0.40                   | 0.36  |
| US-Ne2                         | 0.16            | 0.56  | 0.43                   | 0.40  |
| US-Ne3                         | 0.26            | 0.47  | 0.31                   | 0.31  |
| Median                         | 0.42            | 0.67  | 0.37                   | 0.35  |
| Average                        | 0.55            | 0.76  | 0.39                   | 0.40  |
| Frequency of being<br>the best | 14/25           | 8/25  | 14/25                  | 15/25 |



**Table S5.** The performances of the Noah-MP and the NLDAS ensemble means in simulating the annual cycle and interannual cycle of terrestrial water storage anomaly.

| RFC | Annual cycle |          | Interannual anomaly |          |
|-----|--------------|----------|---------------------|----------|
|     | Noah-MP EM   | NLDAS EM | Noah-MP EM          | NLDAS EM |
| NE  | 0.93         | 0.98     | 0.57                | 0.68     |
| MA  | 0.74         | 0.98     | 0.65                | 0.83     |
| OH  | 0.96         | 0.96     | 0.80                | 0.86     |
| LM  | 0.96         | 0.90     | 0.88                | 0.77     |
| SE  | 0.95         | 0.70     | 0.94                | 0.91     |
| NC  | 0.98         | 0.91     | 0.93                | 0.90     |
| NW  | 0.86         | 0.98     | 0.94                | 0.94     |
| AB  | 0.76         | 0.47     | 0.77                | 0.79     |
| MB  | 0.91         | 0.75     | 0.65                | 0.61     |
| WG  | 0.91         | 0.65     | 0.78                | 0.84     |
| CN  | 0.85         | 0.93     | 0.90                | 0.81     |
| CB  | 0.97         | 0.94     | 0.77                | 0.69     |

**Table S6.** The performances of the Noah-MP and the NLDAS ensemble means in simulating the annual cycle and interannual cycle of soil moisture at 0–0.1 m, 0.1–0.4 m, 0.4–1.0 m, and 0.1–2.0 m ( $w_{soil,i}$ ).

| Depth 0–0.1 m   |                |             |      |      |        |                     |             |      |      |        |
|-----------------|----------------|-------------|------|------|--------|---------------------|-------------|------|------|--------|
| RFC             | Annual cycle   |             |      |      |        | Interannual anomaly |             |      |      |        |
|                 | Noah-<br>MP EM | NLDAS<br>EM | Noah | VIC  | Mosaic | Noah-<br>MP EM      | NLDAS<br>EM | Noah | VIC  | Mosaic |
| NC              | 0.89           | 0.87        | 0.53 | 0.12 | 0.90   | 0.40                | 0.31        | 0.42 | 0.13 | 0.57   |
| NW              | 0.84           | 0.87        | 0.75 | 0.45 | 0.87   | 0.61                | 0.61        | 0.60 | 0.50 | 0.82   |
| AB              | 0.85           | 0.94        | 0.92 | 0.10 | 0.91   | 0.80                | 0.90        | 0.87 | 0.71 | 0.58   |
| WG              | 0.88           | 0.71        | 0.79 | 0.21 | 0.88   | 0.75                | 0.64        | 0.72 | 0.34 | 0.82   |
| CB              | 0.72           | 0.78        | 0.48 | 0.42 | 0.78   | 0.63                | 0.71        | 0.68 | 0.49 | 0.82   |
| Depth 0.1–0.4 m |                |             |      |      |        |                     |             |      |      |        |
| RFC             | Annual cycle   |             |      |      |        | Interannual anomaly |             |      |      |        |
|                 | Noah-<br>MP EM | NLDAS<br>EM | Noah | VIC  | Mosaic | Noah-<br>MP EM      | NLDAS<br>EM | Noah | VIC  | Mosaic |
| NC              | 0.95           | 0.54        | 0.79 | 0.18 | 0.91   | 0.40                | 0.67        | 0.57 | 0.33 | 0.75   |
| AB              | 0.96           | 0.76        | 0.84 | 0.25 | 0.98   | 0.61                | 0.85        | 0.89 | 0.86 | 0.67   |
| WG              | 0.80           | 0.37        | 0.35 | 0.39 | 0.54   | 0.80                | 0.68        | 0.67 | 0.65 | 0.77   |
| CB              | 0.69           | 0.91        | 0.81 | 0.86 | 0.87   | 0.75                | 0.87        | 0.83 | 0.85 | 0.83   |
| Depth 0.4–1.0 m |                |             |      |      |        |                     |             |      |      |        |
| RFC             | Annual cycle   |             |      |      |        | Interannual anomaly |             |      |      |        |
|                 | Noah-<br>MP EM | NLDAS<br>EM | Noah | VIC  | Mosaic | Noah-<br>MP EM      | NLDAS<br>EM | Noah | VIC  | Mosaic |
| AB              | 0.81           | 0.94        | 0.85 | 0.75 | 0.94   | 0.80                | 0.66        | 0.76 | 0.42 | 0.74   |
| WG              | 0.92           | 0.81        | 0.95 | 0.77 | 0.09   | 0.70                | 0.80        | 0.78 | 0.66 | 0.46   |
| Depth 1.0–2.0 m |                |             |      |      |        |                     |             |      |      |        |
| RFC             | Annual cycle   |             |      |      |        | Interannual anomaly |             |      |      |        |
|                 | Noah-<br>MP EM | NLDAS<br>EM | Noah | VIC  | Mosaic | Noah-<br>MP EM      | NLDAS<br>EM | Noah | VIC  | Mosaic |
| AB              | 0.70           | 0.72        | 0.71 | -    | 0.70   | 0.63                | 0.55        | 0.60 | -    | 0.48   |

**Table S7.** The performances of the Noah-MP and the NLDAS ensemble means in simulating the annual cycle and interannual cycle of snow water equivalent (SWE,  $W_{snow}$ ).

| RFC | Annual cycle |          | Interannual anomaly |          |
|-----|--------------|----------|---------------------|----------|
|     | Noah-MP EM   | NLDAS EM | Noah-MP EM          | NLDAS EM |
| NE  | 0.97         | 0.61     | 0.82                | 0.85     |
| MA  | 0.92         | 0.56     | 0.84                | 0.53     |
| OH  | 0.89         | 0.52     | 0.83                | 0.45     |
| LM  | 0.95         | 0.47     | 0.81                | 0.46     |
| SE  | 0.99         | 0.58     | 0.96                | 0.53     |
| NC  | 0.81         | 0.67     | 0.77                | 0.64     |
| NW  | 0.81         | 0.50     | 0.84                | 0.53     |
| AB  | 0.66         | 0.71     | 0.67                | 0.74     |
| MB  | 0.86         | 0.86     | 0.60                | 0.60     |
| WG  | 0.61         | 0.60     | 0.69                | 0.56     |
| CN  | 0.68         | 0.44     | 0.83                | 0.50     |
| CB  | 0.68         | 0.64     | 0.81                | 0.71     |

**Table S8.** The performances of the Noah-MP and the NLDAS ensemble means in simulating the annual cycle against FLUXNET evapotranspiration (ET,  $E$ ) and the interannual anomaly against GLEAM ET.

| RFC | Annual cycle |          | Interannual anomaly |          |
|-----|--------------|----------|---------------------|----------|
|     | Noah-MP EM   | NLDAS EM | Noah-MP EM          | NLDAS EM |
| NE  | 0.99         | 0.97     | 0.87                | 0.69     |
| MA  | 0.99         | 0.97     | 0.87                | 0.77     |
| OH  | 0.97         | 1.00     | 0.80                | 0.84     |
| LM  | 0.98         | 1.00     | 0.68                | 0.72     |
| SE  | 0.96         | 0.99     | 0.72                | 0.59     |
| NC  | 0.97         | 1.00     | 0.81                | 0.86     |
| NW  | 0.99         | 1.00     | 0.90                | 0.85     |
| AB  | 0.98         | 1.00     | 0.91                | 0.92     |
| MB  | 0.95         | 0.99     | 0.90                | 0.94     |
| WG  | 0.98         | 0.98     | 0.95                | 0.95     |
| CN  | 0.91         | 0.96     | 0.93                | 0.89     |
| CB  | 0.92         | 0.96     | 0.97                | 0.92     |

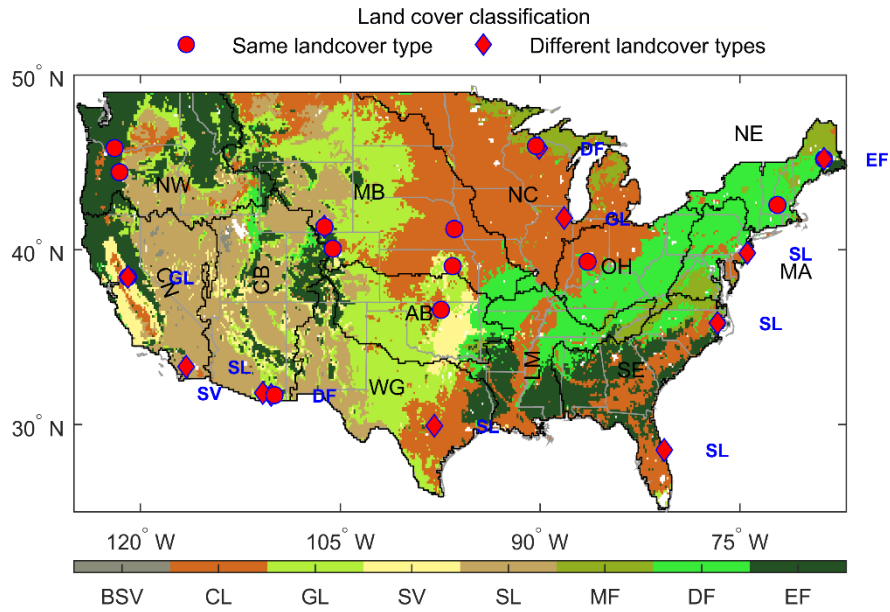

**Figure S1.** The twelve RFCs and land cover classifications over the CONUS. NE denotes Northeast, MA denotes Mid-Atlantic, OH denotes Ohio, LM denotes Lower Mississippi, SE denotes Southeast, NC denotes North Central, NW denotes Northwest, AB denotes Arkansas, MB denotes Missouri, WG denotes West Gulf, CN denotes California-Nevada, and CB denotes Colorado. Red circles and diamonds with blue edge indicate the location of the 25 AmeriFlux sites. The circle indicates that the dominant land cover type in the area is consistent with the AmeriFlux record; while the diamond indicates inconsistent, and the blue label next to the diamond indicates the land cover type recorded by AmeriFlux.

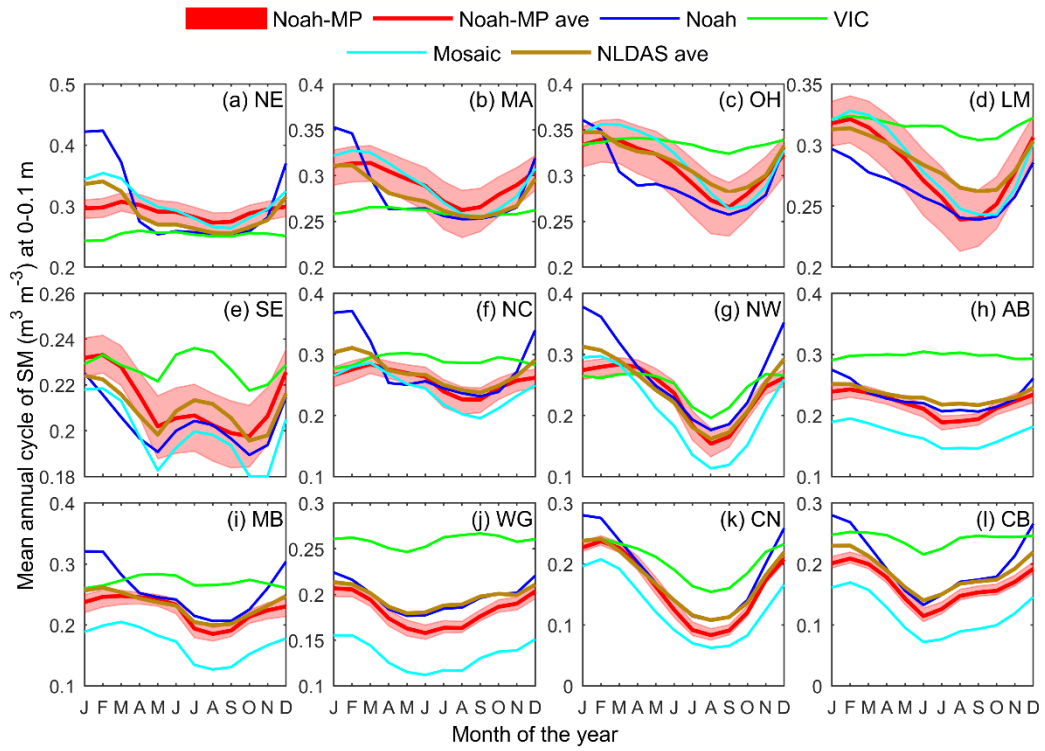

**Figure S2.** As in Figure 1, but for soil moisture at 0–0.1 m.

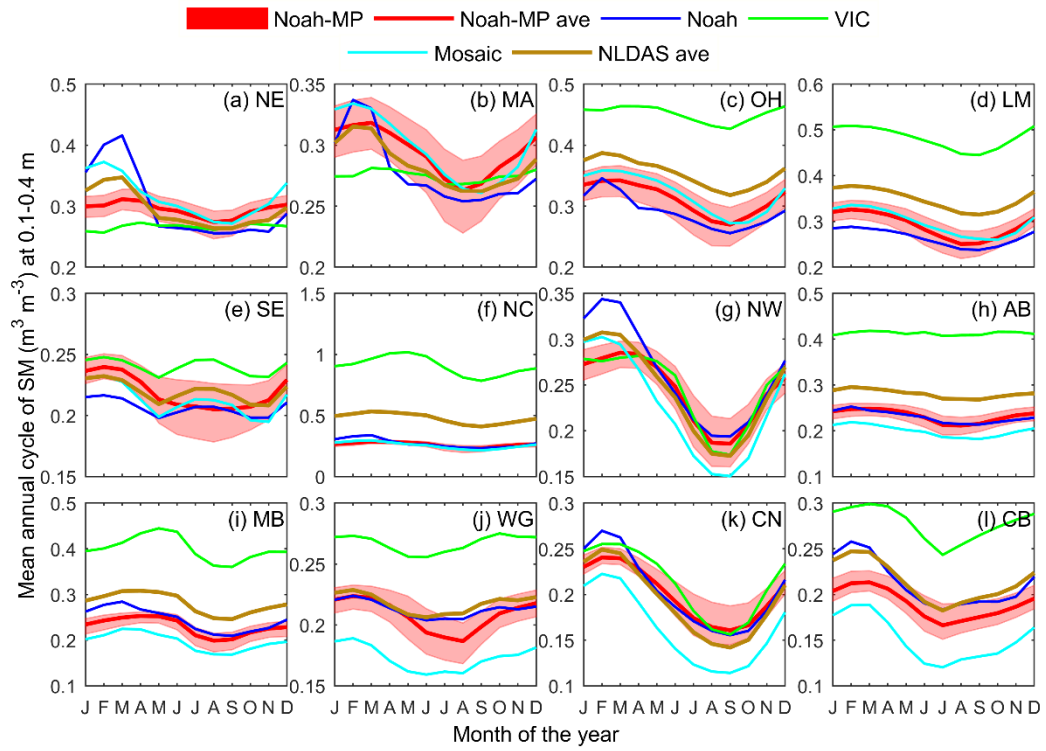

**Figure S3.** As in Figure 1, but for soil moisture at 0.1–0.4 m.

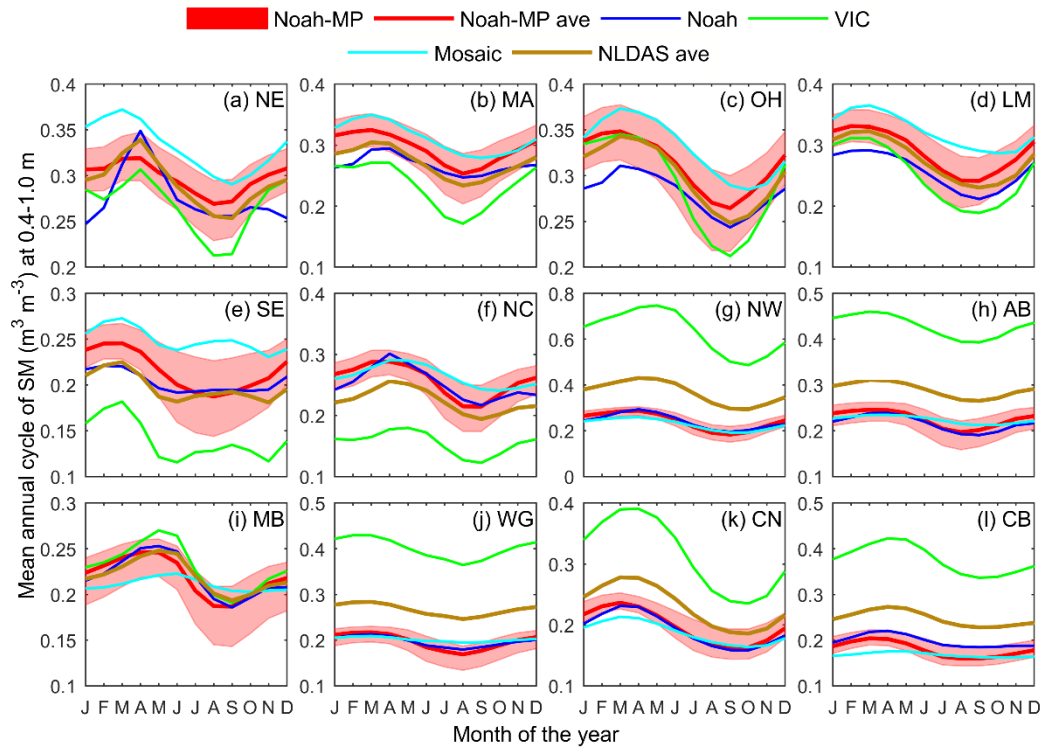

**Figure S4.** As in Figure 1, but for soil moisture at 0.4–1.0 m.



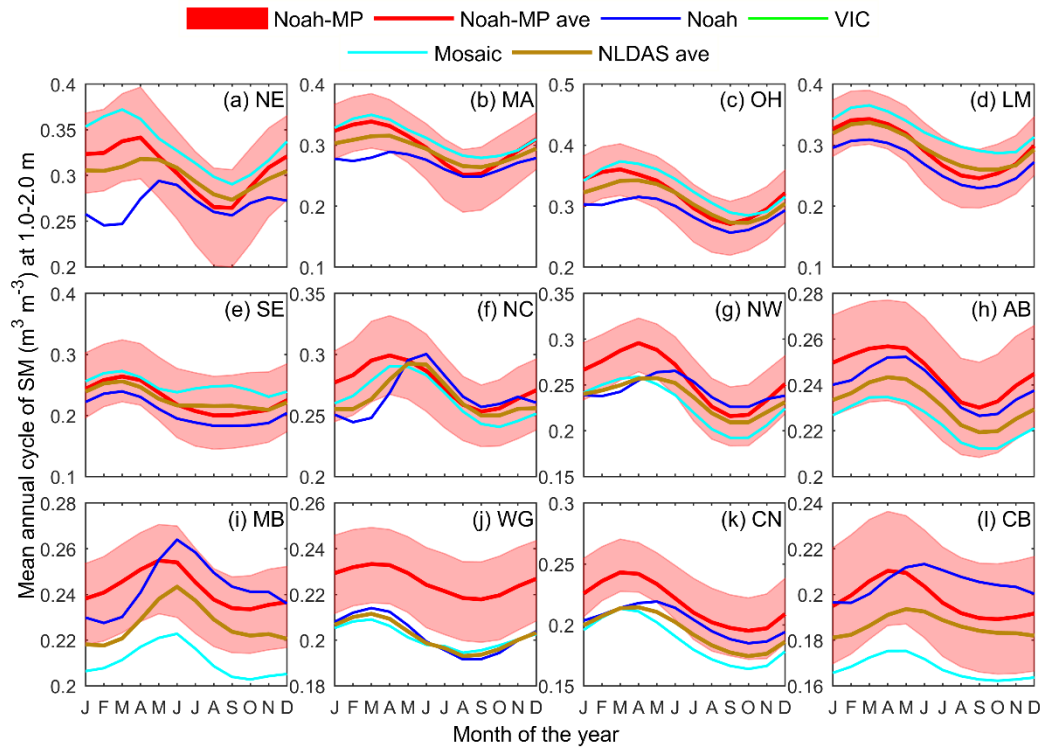

**Figure S5.** As in Figure 1, but for soil moisture at 1.0–2.0 m.

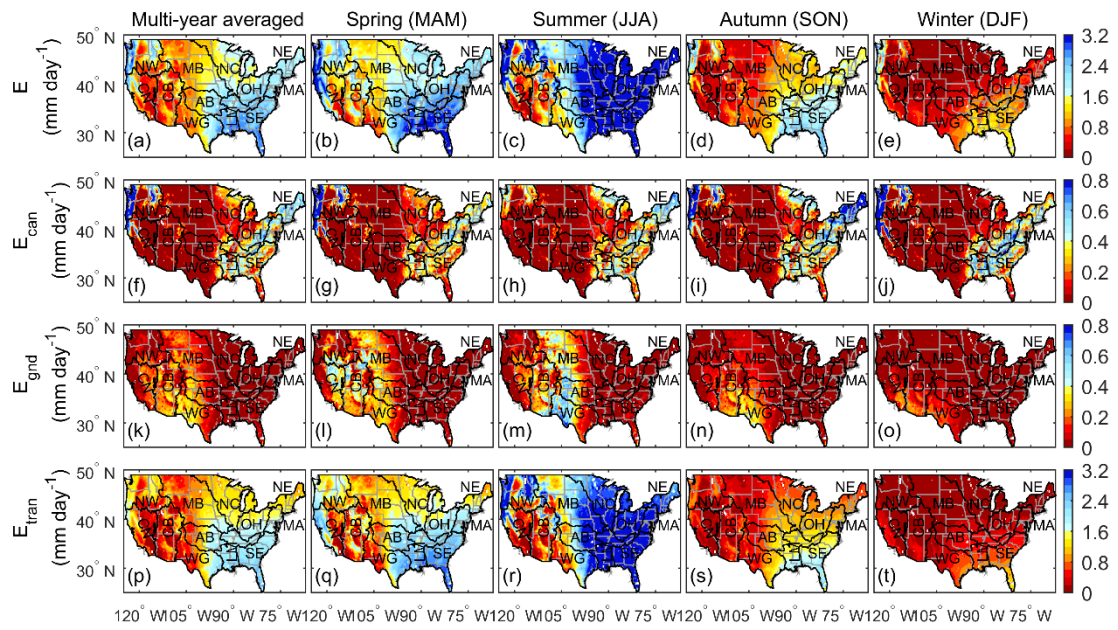

**Figure S6.** Spatial distribution of the multi-year averaged and seasonally averaged total evapotranspiration ( $E$ ), canopy evaporation ( $E_{can}$ ), ground evaporation ( $E_{gnd}$ ), and transpiration ( $E_{tran}$ ) from GLEAM.

## Reference:

Biraud, S., Fischer, M., Chan, S., and Torn, M.: AmeriFlux AmeriFlux US-ARM ARM Southern Great Plains site- Lamont, <https://doi.org/10.17190/AMF/1246027>, 2016.

Blanken, P., Monson, R., Burns, S., Bowling, D., and Turnipseed, A.: AmeriFlux AmeriFlux US-NR1 Niwot Ridge Forest (LTER NWT1), <https://doi.org/10.17190/AMF/1246088>, 2016.

Brunsell, N.: AmeriFlux AmeriFlux US-Kon Konza Prairie LTER (KNZ), <https://doi.org/10.17190/AMF/1246068>, 2016.

Clark, K.: AmeriFlux AmeriFlux US-Ced Cedar Bridge, <https://doi.org/10.17190/AMF/1246043>, 2016.

Desai, A.: AmeriFlux AmeriFlux US-PFa Park Falls/WLEF, <https://doi.org/10.17190/AMF/1246090>, 2016a.

Desai, A.: AmeriFlux AmeriFlux US-Syv Sylvania Wilderness Area, <https://doi.org/10.17190/AMF/1246106>, 2016b.

Desai, A.: AmeriFlux AmeriFlux US-WCr Willow Creek, <https://doi.org/10.17190/AMF/1246111>, 2016c.

Drake, B. and Hinkle, R.: AmeriFlux AmeriFlux US-KS2 Kennedy Space Center (scrub oak), <https://doi.org/10.17190/AMF/1246070>, 2016.

Heilman, J.: AmeriFlux AmeriFlux US-FR3 Freeman Ranch- Woodland, <https://doi.org/10.17190/AMF/1246055>, 2016.

Hollinger, D.: AmeriFlux AmeriFlux US-Ho1 Howland Forest (main tower), <https://doi.org/10.17190/AMF/1246061>, 2016.

Law, B.: AmeriFlux AmeriFlux US-Me2 Metolius-intermediate aged ponderosa pine, <https://doi.org/10.17190/AMF/1246076>, 2016.

Ma, S., Xu, L., Verfaillie, J., and Baldocchi, D.: AmeriFlux AmeriFlux US-Ton Tonzi Ranch, <https://doi.org/10.17190/AMF/1245971>, 2016a.

Ma, S., Xu, L., Verfaillie, J., and Baldocchi, D.: AmeriFlux AmeriFlux US-Var Vaira Ranch- Ione, <https://doi.org/10.17190/AMF/1245984>, 2016b.

Massman, B.: AmeriFlux AmeriFlux US-GLE GLEES, <https://doi.org/10.17190/AMF/1246056>, 2016.

Matamala, R.: AmeriFlux AmeriFlux US-IB2 Fermi National Accelerator Laboratory- Batavia (Prairie site), <https://doi.org/10.17190/AMF/1246066>, 2016.

Munger, J.: AmeriFlux AmeriFlux US-Ha1 Harvard Forest EMS Tower (HFR1), <https://doi.org/10.17190/AMF/1246059>, 2016.

Noormets, A.: AmeriFlux AmeriFlux US-NC1 NC\_Clearcut, <https://doi.org/10.17190/AMF/1246082>,

2016.

Novick, K. and Phillips, R.: AmeriFlux AmeriFlux US-MMS Morgan Monroe State Forest, <https://doi.org/10.17190/AMF/1246080>, 2016.

Oechel, W.: AmeriFlux AmeriFlux US-SO2 Sky Oaks- Old Stand, <https://doi.org/10.17190/AMF/1246097>, 2016.

Scott, R.: AmeriFlux AmeriFlux US-SRM Santa Rita Mesquite, <https://doi.org/10.17190/AMF/1246104>, 2016a.

Scott, R.: AmeriFlux AmeriFlux US-Wkg Walnut Gulch Kendall Grasslands, <https://doi.org/10.17190/AMF/1246112>, 2016b.

Scott, R.: AmeriFlux AmeriFlux US-CMW Charleston Mesquite Woodland, <https://doi.org/10.17190/AMF/1660339>, 2020.

Suyker, A.: AmeriFlux AmeriFlux US-Ne1 Mead - irrigated continuous maize site, <https://doi.org/10.17190/AMF/1246084>, 2016a.

Suyker, A.: AmeriFlux AmeriFlux US-Ne2 Mead - irrigated maize-soybean rotation site, <https://doi.org/10.17190/AMF/1246085>, 2016b.

Suyker, A.: AmeriFlux AmeriFlux US-Ne3 Mead - rainfed maize-soybean rotation site, <https://doi.org/10.17190/AMF/1246086>, 2016c.

Wharton, S.: AmeriFlux AmeriFlux US-Wrc Wind River Crane Site, <https://doi.org/10.17190/AMF/1246114>, 2016.
